# Supplementary material for: Bispecific antibodies redirect synthetic agonistic receptor modified T cells against melanoma
Source: HighWire-hosted journal article supplement (doi:10.1136/jitc-2022-006436), 2023-05-01
Supplement: jitc-2022-006436supp001_data_supplement.pdf [file jitc-2022-006436supp001_data_supplement.pdf]

**BiAb redirect SAR T cell therapy in melanoma****1 SUPPLEMENTARY METHODS****2 Processing and analysis of single-cell RNA-sequencing data**

3 All analyses from UMI count matrices were run with python 3 with the Scanpy API v.1.4.6<sup>1</sup> and  
4 anndata v.0.7.1.<sup>2</sup> to obtain high quality cells, barcodes from GSE72056 were filtered based on  
5 total UMI counts and total genes after visual inspection of distributions. Cells with over 20000  
6 counts or 10000 genes as well as cells with under 6000 counts or 2000 genes were removed.  
7 Genes with expression in less than 20 cells were excluded. Cells were normalised using the  
8 SCRAN algorithm,<sup>3</sup> expression values were then log-transformed. The top 4000 highly variable  
9 genes were selected based on normalised dispersion as described in.<sup>4</sup> To efficiently capture the  
10 underlying data structure in two dimensions, a neighborhood graph was computed on the first  
11 50 principal components using Scanpy's pp.neighbors with 15 neighbors. For 2D visualization,  
12 embedding the neighborhood graph via UMAP was done by running Scanpy's tl.umap with  
13 default parameters. Annotations of cells were provided by the authors.

**14 Analysis of TYRP1 and MCSP expression using flow cytometry**

15 Cells were detached using Accutase solution (Capricorn Scientific). Dead cells were stained  
16 using the eFluor™ 780 fixable viability dye (1:1000, eBioscience, Thermo Fisher Scientific) for  
17 15 minutes at room temperature, followed by staining of cell surface proteins using either 0.5  
18 µg/mL of αMCSP/αE3 at 4°C or αTYRP1/αE3 at 37 °C for 30 minutes. Then, staining of primary  
19 antibodies were conducted using a secondary goat polyclonal antibody against human IgG (2.5  
20 µg/mL, Southern Biotech) for 15 minutes at room temperature. Median fluorescence intensity  
21 (MFI) ratio was calculated based on ratio of MCSP or TYRP1 stain and secondary antibody only  
22 stain.

23 Cells were analyzed on LSRFortessa (BD Biosciences) or CytoFLEX (Beckman Coulter Life  
24 Sciences) flow cytometers, and data were analyzed with FlowJo software version 9.9.5 or  
25 version 10.3.

#### 26 **Analysis of TYRP1 and MCSP expression using confocal microscopy**

27 Cells were detached using Accutase solution (Capricorn Scientific), transferred to Poly-L-Lysine  
28 coated SuperFrost Plus slides (Thermo Fisher Scientific) and incubated at 37 °C for 60 minutes  
29 for cell attachment. Cells were first fixed with 1 % PFA solution (Carl Roth) for 10 minutes and  
30 washed with PBS. For TYRP1 staining cells were permeabilized with Triton X100 (v/v 0,5%,  
31 Carl Roth). Following permeabilization cells were stained with 1 µg/mL αTYRP1/αE3 for 60  
32 minutes at room temperature. MCSP staining of non-permeabilized cells was conducted with 10  
33 µg/mL αMCSP/αE3 for 60 minutes at room temperature. Then, secondary antibody against  
34 human IgG (1 µg/mL, Southern Biotech) and DNA dye Hoechst 33342 (2 µM, Thermo Fisher  
35 Scientific) were applied for 30 minutes at room temperature. After sealing cells with ProLong  
36 Glass antifade mountant (Thermo Fisher Scientific), samples were analyzed using the laser-  
37 scanning confocal microscope ZEISS LSM 800 (Carl Zeiss AG) and images were acquired  
38 using Zen software (v2.3, Carl Zeiss AG).

#### 39 **Preparation of single cell suspensions, antibody staining and flow cytometry**

40 Lymph nodes and spleens were passed through 30 µm cell strainers, followed by erythrocyte  
41 lysis in the spleens. Tumors and lungs were digested with 1.5 mg/mL collagenase IV and  
42 50 U/mL DNase I for 30 minutes at 37 °C under agitation. Dead cells were stained using the  
43 violet fixable viability dye (BioLegend) for 15 minutes at room temperature, followed by blocking  
44 of Fc receptors with TruStain FcX (BioLegend) for 20 minutes at 4 °C. Following this, cell  
45 surface proteins were stained for 20 minutes at 4 °C. For the analysis of human T cells  
46 antibodies against CD45 (2D1), CD3 (OKT3), CD4 (OKT4) CD8a (RPA-T8), CD45RO (UCHL1),

### BiAb redirect SAR T cell therapy in melanoma

47 CCR7 (G043H7), PD-1 (EH12.2H7), 4-1BB (4B4-1), CD69 (FN50) and EGFR (A-13) for  
48 detection of SAR (all from BioLegend) were used. For the analysis of murine T cells antibodies  
49 against CD45 (30-F11), CD3 (17a2), CD4 (GK1.5) CD8a (53-6.7) and EGFR (A-13) for  
50 detection of SAR (all from BioLegend) were used. Additionally, tumor cells were detected using  
51 the GFP expression of YUMM1.1 TYRP1-LUC-GFP cells.

52 Cells were analyzed on Canto or LSRFortessa flow cytometers (BD Biosciences), and data  
53 were analyzed with FlowJo software version 9.9.5 or version 10.3.

### 54 Construction of 2 + 1 bispecific antibodies

55 The construction of expression vectors for BiAb was performed by standard recombinant DNA  
56 technologies. All antibody chain genes were separately inserted into expression vectors under  
57 control of a MPSV or a SV40E hCMV promoter. The plasmids were cotransfected and  
58 transiently expressed in HEK293 or CHO cells. The 2 + 1 antibody contained two Fabs for  
59 hMCSP or TYRP1 and one Fab for EGFRvIII which was N-terminally fused to one arm of the  
60 hMCSP or TYRP1 IgG. In order to obtain high yields of correctly paired molecules the "knobs-  
61 into-holes" technology was used for heterodimerization. P329G, L234A, and L235A (PG LALA)  
62 mutations were inserted in CH3 and CH2 domains to prevent binding to FcγRs and C1q.<sup>5,6</sup> To  
63 ensure correct pairing of the different chains, the CrossMAb<sup>VH-VL</sup> technology (αEGFRvIII) and  
64 charged residues (αMCSP) were used.<sup>7</sup>

### 65 Purification and quality control

66 All antibodies were transiently produced in HEK293 or CHO cells, purified and analyzed for  
67 integrity and monomer content, as previously described.<sup>5</sup>

### 68 Bispecific antibody binding assays

69 Apparent dissociation constants ( $K_D$ ) were measured by calibrated flow cytometry on a Fortessa  
 70 II instrument (BD Biosciences) with 3.0 to 3.4  $\mu\text{m}$  Rainbow Calibration particles (BioLegend) as  
 71 calibration control.<sup>8</sup> After normalization, data points were fitted to a one-site specific binding  
 72 model.

73

74 **Supplementary Table 1: Patient characteristics**

| Name / cells | Biopsy             | Patient age at biopsy time | Gender | Clinical stage at biopsy time | Site of biopsy | Tx before biopsy                         | Tx after biopsy                                                                                                                                                                               | Primary tumor subtype                                                | Primary tumor location | Breslow's index of primary tumor | Genotype           |
|--------------|--------------------|----------------------------|--------|-------------------------------|----------------|------------------------------------------|-----------------------------------------------------------------------------------------------------------------------------------------------------------------------------------------------|----------------------------------------------------------------------|------------------------|----------------------------------|--------------------|
| Patient 1    | n. a.              | n. a.                      | n. a.  | n. a.                         | n. a.          | n. a.                                    | n. a.                                                                                                                                                                                         | n. a.                                                                | n. a.                  | n. a.                            | n. a.              |
| Patient 2    | n. a.              | n. a.                      | n. a.  | n. a.                         | n. a.          | n. a.                                    | n. a.                                                                                                                                                                                         | n. a.                                                                | n. a.                  | n. a.                            | n. a.              |
| Patient 3    | n. a.              | n. a.                      | n. a.  | n. a.                         | n. a.          | n. a.                                    | n. a.                                                                                                                                                                                         | n. a.                                                                | n. a.                  | n. a.                            | n. a.              |
| Patient 4    | n. a.              | n. a.                      | n. a.  | n. a.                         | n. a.          | n. a.                                    | n. a.                                                                                                                                                                                         | n. a.                                                                | n. a.                  | n. a.                            | n. a.              |
| Patient 5    | n. a.              | n. a.                      | n. a.  | n. a.                         | n. a.          | n. a.                                    | n. a.                                                                                                                                                                                         | n. a.                                                                | n. a.                  | n. a.                            | n. a.              |
| Patient 6    | n. a.              | n. a.                      | n. a.  | n. a.                         | n. a.          | n. a.                                    | n. a.                                                                                                                                                                                         | n. a.                                                                | n. a.                  | n. a.                            | n. a.              |
| Patient 7    | n. a.              | n. a.                      | n. a.  | n. a.                         | n. a.          | n. a.                                    | n. a.                                                                                                                                                                                         | n. a.                                                                | n. a.                  | n. a.                            | n. a.              |
| Patient 8    | Metastasis (skin)  | 61 yo                      | Female | III                           | Skin (leg)     | Dabrafenib (BRAFI) and trametinib (MEKI) | Ipilimumab; Encorafenib (BRAFI) + Binimetinib (MEKI) + Infigratinib (FGFRi); Pembrolizumab; radiation therapy (30Gy), multiple excisions; electro-chemotherapy (bleomycin); vemurafenib; TVEC | Nodular melanoma                                                     | Leg                    | 4 mm                             | BRAF V600E, NRASwt |
| Patient 9    | Metastasis (skin)  | n. a.                      | n. a.  | n. a.                         | Skin           | n. a.                                    | n. a.                                                                                                                                                                                         | n. a.                                                                | n. a.                  | n. a.                            | n. a.              |
| Patient 10   | Metastasis (skin)  | n. a.                      | n. a.  | n. a.                         | Skin           | n. a.                                    | n. a.                                                                                                                                                                                         | n. a.                                                                | n. a.                  | n. a.                            | n. a.              |
| Patient 11   | Primary melanoma   | 73 yo                      | Male   | IV                            | Skin (abdomen) | None                                     | Transarterial chemoembolization (patient was also diagnosed with hepatocellular carcinoma 2 months later)                                                                                     | Nodular melanoma with ulceration mitotic index 5/mm <sup>2</sup> T3b | Abdomen                | 4 mm                             | n. a.              |
| Patient 12   | Primary melanoma   | 86 yo                      | Female | III                           | Skin (neck)    | None                                     | n. a.                                                                                                                                                                                         | Nodular melanoma                                                     | Neck                   | n. a.                            | n. a.              |
| Patient 13   | Metastasis (brain) | 36 yo                      | Female | IV                            | Brain          | None                                     | None                                                                                                                                                                                          | n. a.                                                                | Forehead               | 3 mm                             | BRAF V600          |

75

76

77

78

79

80

81 **REFERENCES**

**BiAb redirect SAR T cell therapy in melanoma**

- 82 1. Wolf FA, Angerer P, Theis FJ. SCANPY: large-scale single-cell gene expression data analysis.  
83 *Genome Biology* 2018;19(1):15. doi: 10.1186/s13059-017-1382-0
- 84 2. Virshup I, Rybakov S, Theis FJ, et al. anndata: Annotated data. *bioRxiv*  
85 2021:2021.12.16.473007. doi: 10.1101/2021.12.16.473007
- 86 3. Lun AT, Bach K, Marioni JC. Pooling across cells to normalize single-cell RNA sequencing  
87 data with many zero counts. *Genome Biology* 2016;17(1):75. doi: 10.1186/s13059-016-  
88 0947-7
- 89 4. Zheng GX, Terry JM, Belgrader P, et al. Massively parallel digital transcriptional profiling of  
90 single cells. *Nat Commun* 2017;8:14049. doi: 10.1038/ncomms14049 [published Online  
91 First: 20170116]
- 92 5. Karches CH, Benmeharek M-R, Schmidbauer ML, et al. Bispecific Antibodies Enable Synthetic  
93 Agonistic Receptor-Transduced T Cells for Tumor Immunotherapy. *Clinical Cancer*  
94 *Research* 2019;25(19):5890-900. doi: 10.1158/1078-0432.Ccr-18-3927
- 95 6. Hessel AJ, Hangartner L, Hunter M, et al. Fc receptor but not complement binding is  
96 important in antibody protection against HIV. *Nature* 2007;449(7158):101-4. doi:  
97 10.1038/nature06106
- 98 7. Schaefer W, Regula JT, Böhner M, et al. Immunoglobulin domain crossover as a generic  
99 approach for the production of bispecific IgG antibodies. *Proceedings of the National*  
100 *Academy of Sciences* 2011;108(27):11187-92. doi: 10.1073/pnas.1019002108
- 101 8. Benedict CA, MacKrell AJ, Anderson WF. Determination of the binding affinity of an anti-  
102 CD34 single-chain antibody using a novel, flow cytometry based assay. *Journal of*  
103 *Immunological Methods* 1997;201(2):223-31. doi: [https://doi.org/10.1016/S0022-](https://doi.org/10.1016/S0022-1759(96)00227-X)  
104 [1759\(96\)00227-X](https://doi.org/10.1016/S0022-1759(96)00227-X)
- 105
