# Supplementary material for: Bispecific antibodies redirect synthetic agonistic receptor modified T cells against melanoma
Source: PubMed Central journal article supplement — J Immunother Cancer. 2023 May 19;11(5):e006436. doi: 10.1136/jitc-2022-006436 (PMC10201273; doi:10.1136/jitc-2022-006436), 2023-05-19
Supplement: jitc-2022-006436supp002.pdf [file jitc-2022-006436supp002.pdf]

Supplementary figure 1

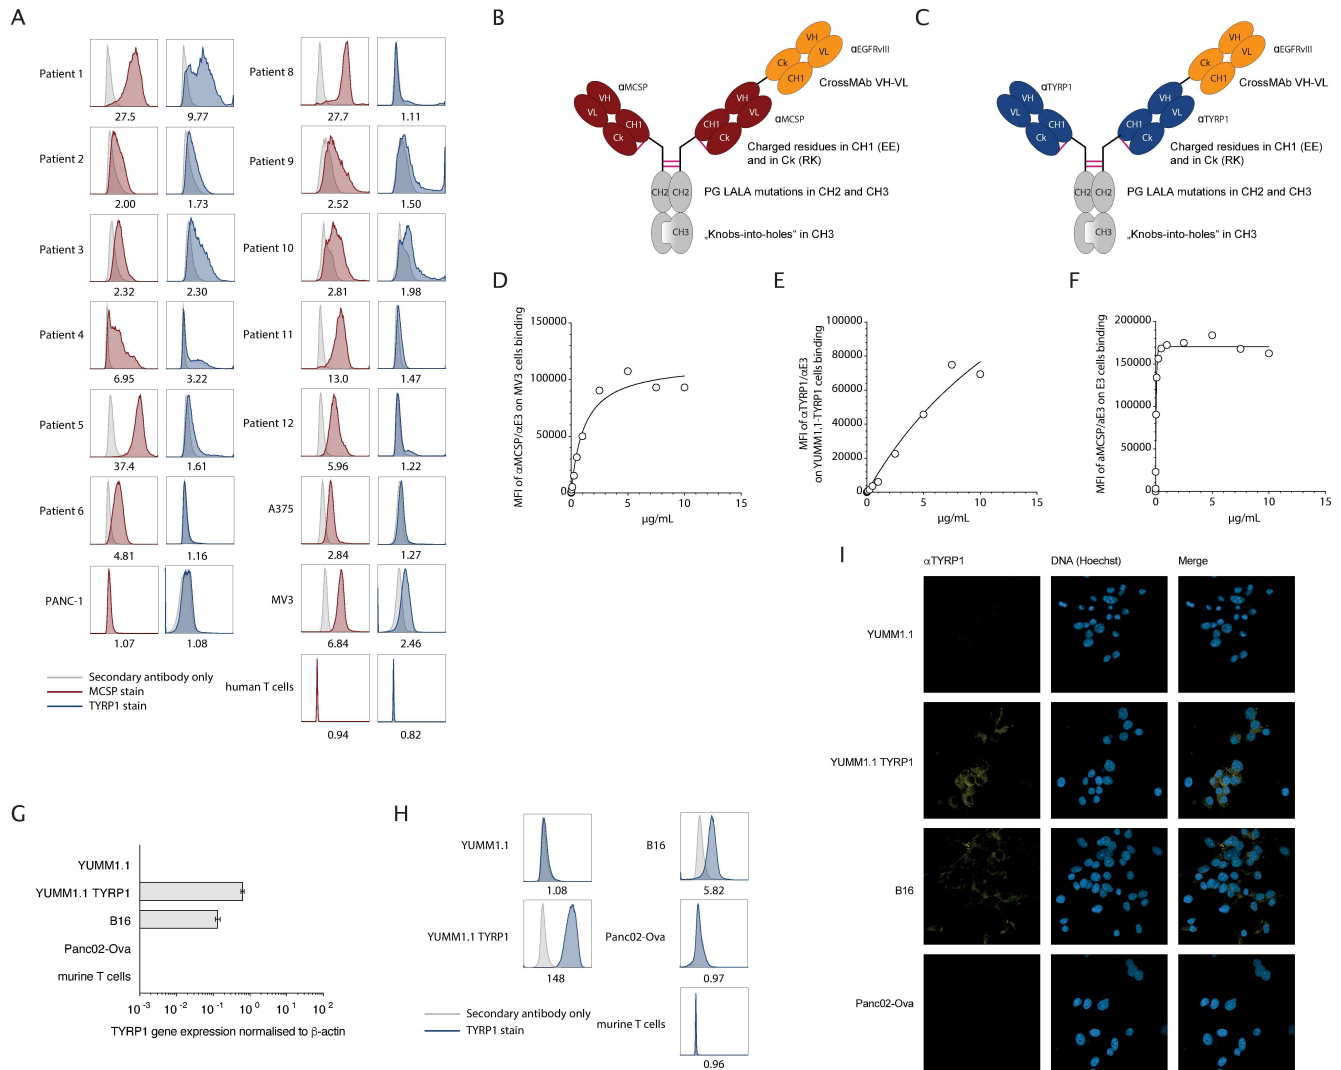

Supplementary figure 2

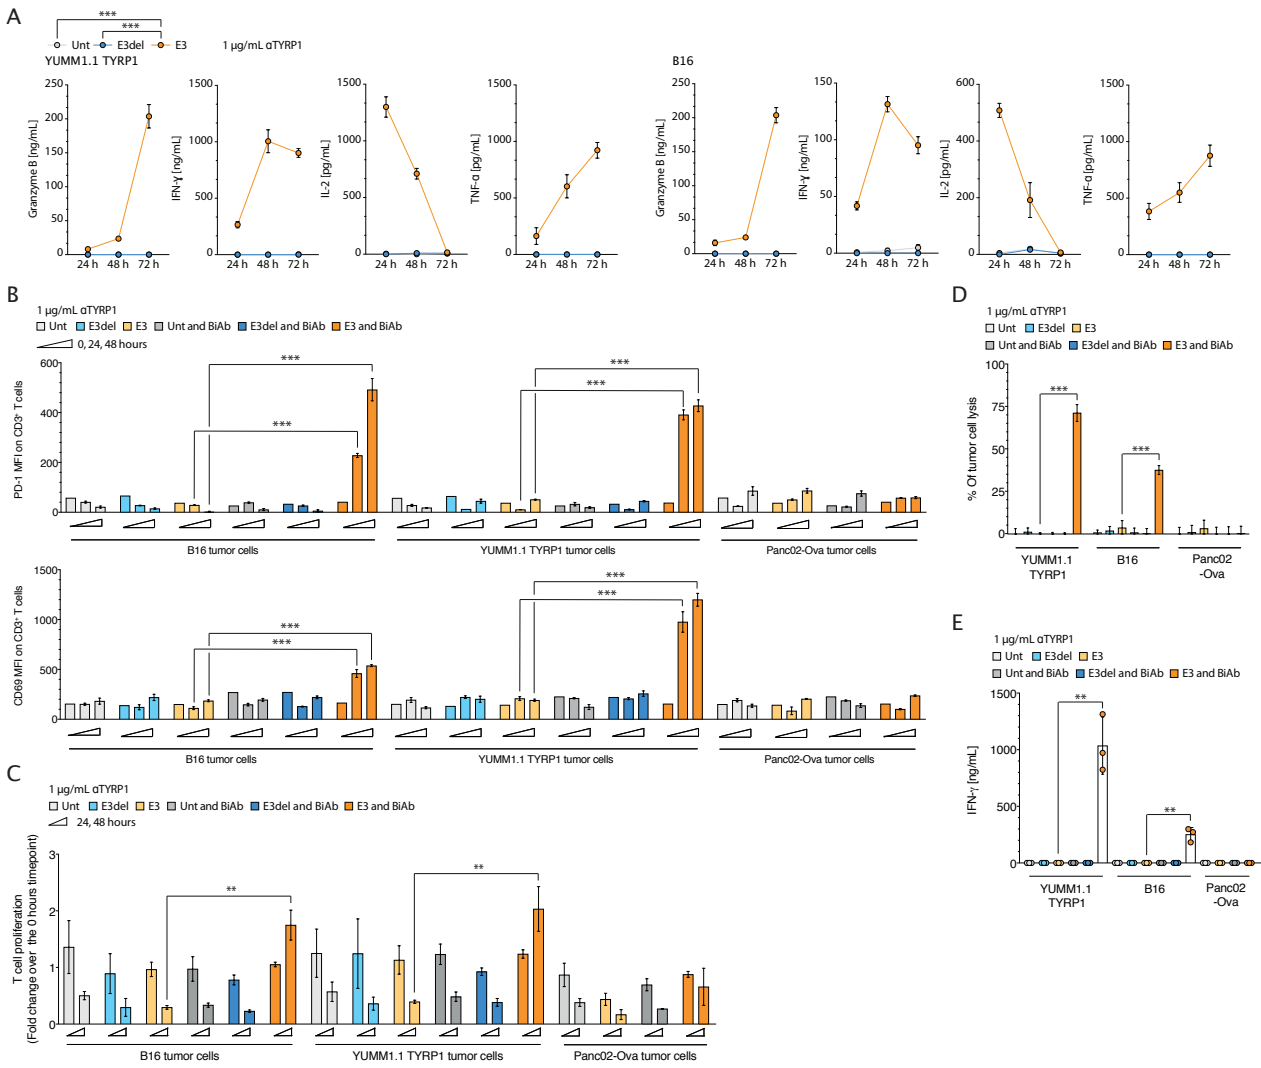

Supplementary figure 3

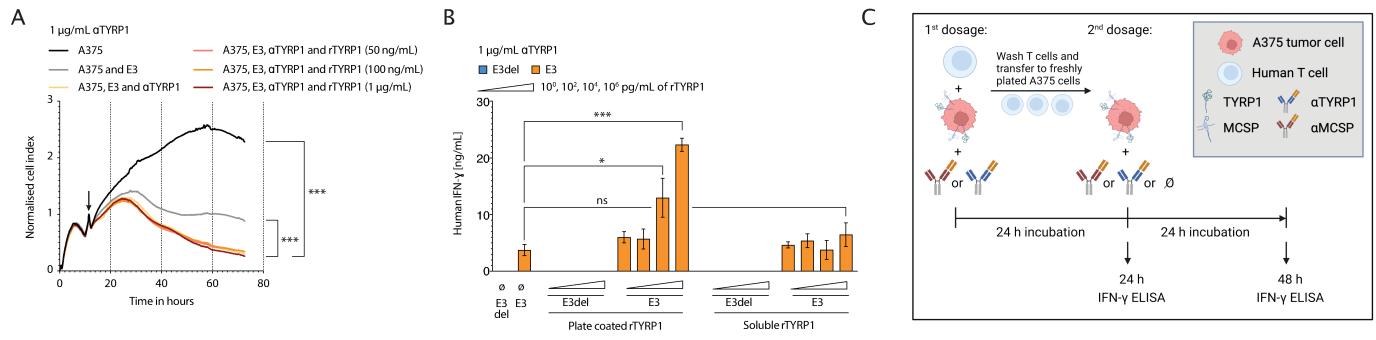

Supplementary figure 4

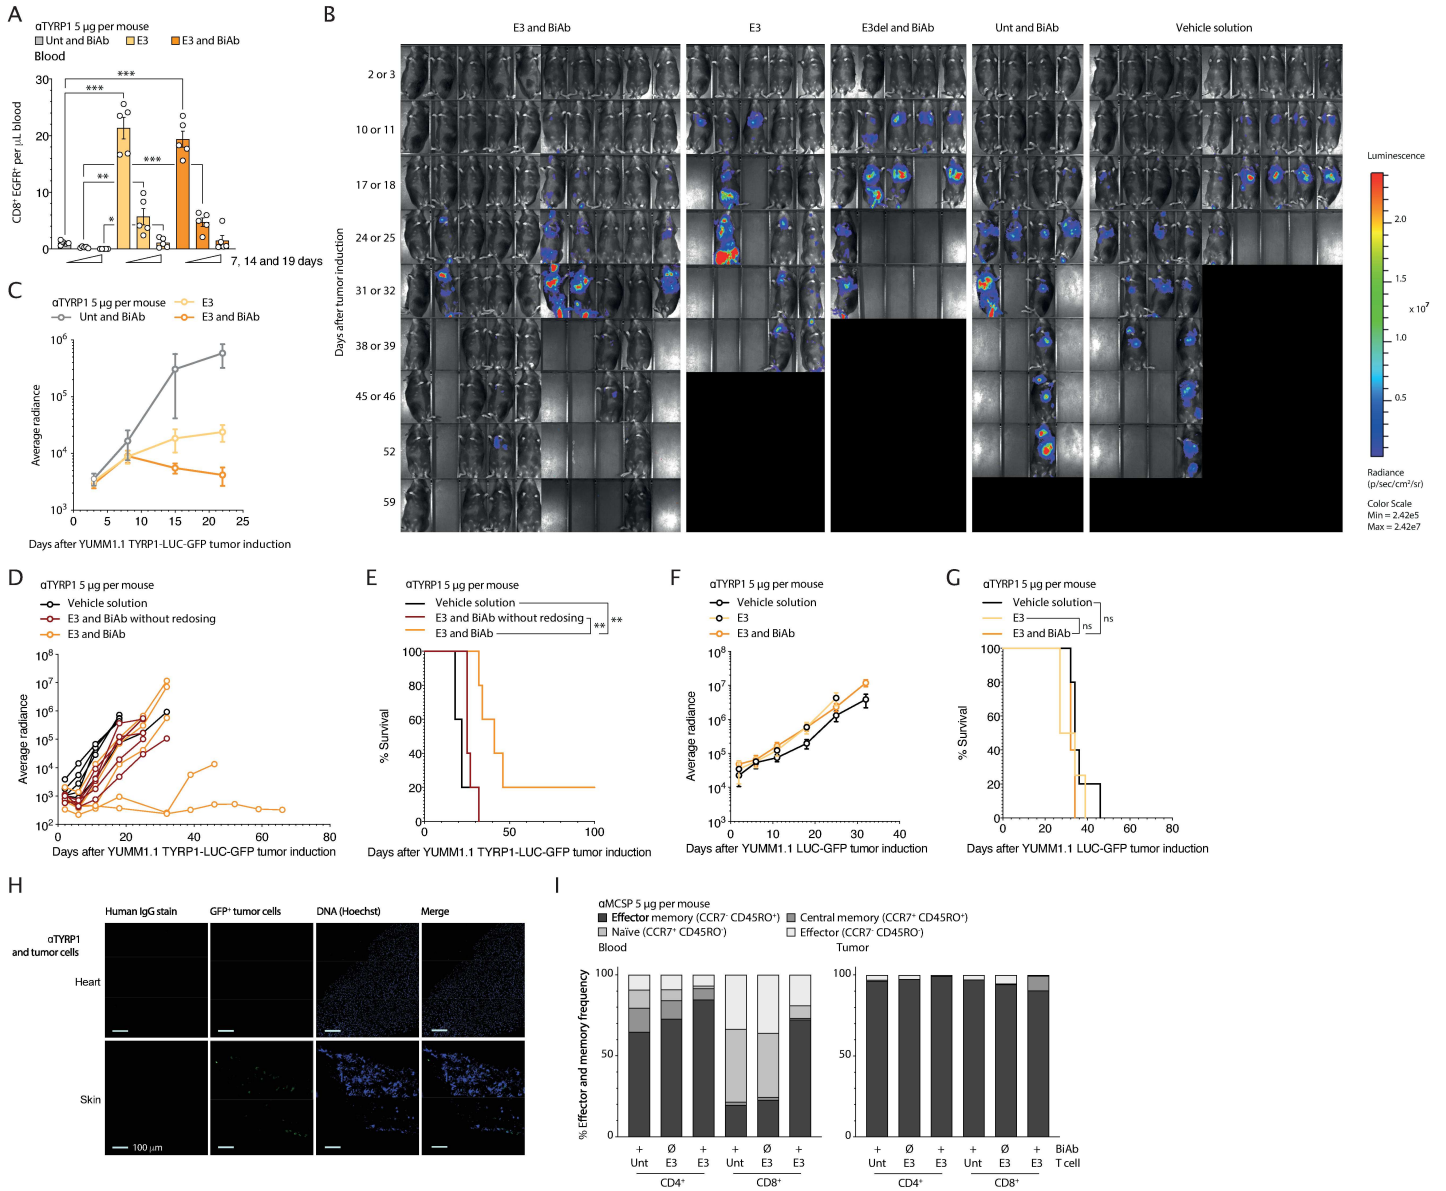

**BiAb redirect SAR T cell therapy in melanoma**

1 **Supplementary figure 1: MCSP and TYRP1 expression on patient-derived melanoma**  
2 **samples, human and murine melanoma cell lines, structure and binding properties of**  
3  **$\alpha$ TYRP1/ $\alpha$ E3 and  $\alpha$ MCSP/ $\alpha$ E3 BiAb.** A) MCSP and TYRP1 protein expression was  
4 assessed with either one of the BiAb (human IgG1) and anti-human IgG secondary antibody.  
5 Median fluorescence intensity (MFI) ratio of MCSP or TYRP1 stain and secondary antibody  
6 only stain was depicted below each flow cytometry plot. B) and C) Schematic drawing of the  
7  $\alpha$ MCSP/ $\alpha$ E3 BiAb molecule in (B) and the  $\alpha$ TYRP1/ $\alpha$ E3 in (C). VL and VH, variable domain  
8 of immunoglobulin (Ig) light or heavy chain. CK, constant domain of Ig light chain kappa.  
9 CH1/2/3, first/second/third constant domain of Ig heavy chain. E, R, K, P, G, L, A, amino  
10 acids. D-F) Dissociation constant ( $K_D$ ) determination of BiAb modules. Binding to MCSP in  
11 (D) ( $K_D = 1.1 \mu\text{g/mL}$ ), TYRP1 in (E) ( $K_D = 18 \mu\text{g/mL}$ ), and EGFRvIII in (F) ( $K_D = 42 \text{ ng/mL}$ ) on  
12 MV3, YUMM1.1 TYRP1 or E3 SAR T cells, as measured by flow cytometry. G) RT-PCR  
13 TYRP1 gene analysis of murine cell lines, and murine T cells. H) TYRP1 protein expression  
14 was assessed with  $\alpha$ TYRP1/ $\alpha$ E3 BiAb (human IgG1) and anti-human IgG secondary  
15 antibody. I) Microscopic analysis of TYRP1 expression on permeabilized YUMM1.1,  
16 YUMM1.1 TYRP1, B16 and Panc02-Ova cells using  $\alpha$ TYRP1/ $\alpha$ E3 BiAb ( $\alpha$ TYRP1) and anti-  
17 human IgG secondary antibody. Experiments show mean values of two biological  
18 experiments for (D), (E) and (F), one experiment for (A), and (H). Experiments in subfigure  
19 (G) show mean values  $\pm$  SD calculated from 3 technical replicates and one representative of  
20 two independent experiments in subfigure (I).

21

22 **Supplementary figure 2:  $\alpha$ TYRP1/ $\alpha$ E3 BiAb activates SAR T cells to mediate specific**  
23 **cytotoxicity against murine melanoma cell lines.** A) ELISA for granzyme B, IFN- $\gamma$ , IL-2  
24 and TNF- $\alpha$  on supernatant of murine T cells in coculture with murine melanoma cell lines  
25 YUMM1.1 TYRP1 or B16 (E:T 2:1) and  $\alpha$ TYRP1/ $\alpha$ E3 BiAb ( $\alpha$ TYRP1, 1  $\mu\text{g/mL}$ ). Supernatant  
26 was taken after 24, 48 and 72 hours (n = 3). B) Frequency of PD-1 and CD69 expression on

0

27 T cells after 0, 24 and 48 hours of coculture with murine melanoma cell lines YUMM1.1  
28 TYRP1, B16 or murine pancreatic cancer cell line Panc02-Ova (E:T 2:1) and  $\alpha$ TYRP1/ $\alpha$ E3  
29 BiAb (1  $\mu$ g/mL) (n = 3). C) Following 48 hours of coculture the CD3<sup>+</sup> T cell count was  
30 assessed using a flow cytometry-based readout and normalized to the 0 hour conditions  
31 (n = 3). D) The percentage lysis of melanoma cell lines YUMM1.1 TYRP1, B16 and Panc02-  
32 Ova mediated via  $\alpha$ TYRP1/ $\alpha$ E3 BiAb and SAR T cells. The cytotoxicity was assessed with a  
33 LDH assay after 48 hours of coculture (n = 3). E) ELISA for IFN- $\gamma$  on supernatant of murine T  
34 cells in coculture with murine melanoma cell lines YUMM1.1 TYRP1, B16 or Panc02-Ova  
35 (E:T 2:1) and  $\alpha$ TYRP1/ $\alpha$ E3 BiAb ( $\alpha$ TYRP1, 1  $\mu$ g/mL). Statistical analysis was performed  
36 using the unpaired two-tailed Student's t test. Statistics shown in (A) were calculated based  
37 on the 24 hour time points. Experiments show mean values  $\pm$  SD calculated from 3  
38 biological replicates and are representative of three independent experiments (A, B, D and  
39 E) and mean values  $\pm$  SEM calculated from n independent biological replicates (C).

40

41 **Supplementary figure 3: Modular, selective and reversible activation of SAR T cells,**  
42 **irrespective of soluble forms of TYRP1 tumor antigen.** A) A375 melanoma cells were  
43 plated and cocultured with human SAR T cells (E:T 2:1) and  $\alpha$ TYRP1/ $\alpha$ E3 BiAb ( $\alpha$ TYRP1, 1  
44  $\mu$ g/mL). Different concentrations of soluble, recombinant TYRP1 (rTYRP1) were added. The  
45 tumor cell lysis over time was assessed using xCELLigence (n = 3). The cell index was  
46 normalized to the respective time point of T cell addition as indicated by an arrow. B) Human  
47 SAR or E3del control T cells and  $\alpha$ TYRP1/ $\alpha$ E3 BiAb (1  $\mu$ g/mL) were plated in wells that  
48 were either coated with different concentrations of rTYRP1 or where different concentrations  
49 of soluble rTYRP1 were added to the medium. After 48 hours the supernatant was taken and  
50 analyzed for IFN- $\gamma$  using ELISA (n = 3). C) Schematic overview of the assay setup from  
51 experiments in Figure 4 (D) and (E). Analyses of differences between groups for (A) were  
52 performed using two-way ANOVA with correction for multiple testing by the Bonferroni

**BiAb redirect SAR T cell therapy in melanoma**

53 method. For statistical analysis of (B), the unpaired two-tailed Student's t test was used.  
54 Experiments show mean values  $\pm$  SD calculated from 3 biological replicates and are  
55 representative of three independent experiments.

56

57 **Supplementary figure 4: Treatment with the SAR T cell-BiAb combination is effective**  
58 **in syngeneic and xenograft melanoma models.** A) The murine CD8<sup>+</sup> SAR T cell  
59 persistence per  $\mu$ L blood was analyzed using flow cytometry 7, 14 and 19 days after T cell  
60 transfer. The mice were treated according to the experiment in Figure 5 (C). B) *In vivo*  
61 imaging data of Figure 5 (A) displaying luminescent signal in radiance for all experimental  
62 groups two or three days after YUMM1.1 TYRP1-LUC-GFP tumor induction onwards (days  
63 2/3, 10/11, 17/18, 24/25, 31/32, 38/39, 45/46, 52 and 59). C) YUMM1.1 TYRP1-LUC-GFP  
64 tumor growth curves of experiment depicted in Figure 5 (C) based on *in vivo* luminescent  
65 signal imaging (days 3, 8, 15 and 22). D) YUMM1.1 TYRP1-LUC-GFP tumor growth curves  
66 based on *in vivo* luminescent signal imaging (days 2, 6, 11, 18, 25, 32, 39 and 45; for each  
67 group n = 5). The mice were treated according to the experiment in Figure 5 (A) with either  
68 SAR T cells and  $\alpha$ TYRP1/ $\alpha$ E3 BiAb (redosed twice per week), SAR T cells and  
69  $\alpha$ TYRP1/ $\alpha$ E3 BiAb (one dose) or the vehicle solution (for all groups: n = 5). E) Percentage  
70 survival readout. F) YUMM1.1 LUC-GFP tumor growth curves based on *in vivo* luminescent  
71 signal imaging (days 2, 6, 11, 18, 25 and 32). The mice were treated according to the  
72 experiment in Figure 5 (A) with either SAR T cells and  $\alpha$ TYRP1/ $\alpha$ E3 BiAb (redosed twice per  
73 week) (n = 5), SAR T cells (n = 4), or the vehicle solution (n = 5). The experiment was  
74 simultaneously conducted with the experiment depicted in Supplementary Figure 4D. G)  
75 Percentage survival readout. H) Immunofluorescence imaging of the  $\alpha$ TYRP1/ $\alpha$ E3 BiAb and  
76 tumor cell-derived GFP in heart and skin tissue of tumor bearing mice injected with the  
77  $\alpha$ TYRP1/ $\alpha$ E3 BiAb. The mice were treated according to the experiment in Figure 5 (D). I)  
78 Frequency of effector memory (CCR7<sup>-</sup> and CD45RO<sup>+</sup>), central memory (CCR7<sup>+</sup> and

79 CD45RO<sup>+</sup>), naïve (CCR7<sup>+</sup> and CD45RO<sup>-</sup>) and effector (CCR7<sup>-</sup> and CD45RO<sup>-</sup>) phenotype on  
80 human CD4<sup>+</sup> and CD8<sup>+</sup> T cells in blood and tumor 14 days after T cell transfer. For statistical  
81 analysis of (A), the unpaired two-tailed Student's t test was used. For statistical analysis of  
82 survival data, the log-rank test was applied. Experiments show mean values ± SEM  
83 calculated from n biological replicates, one experiment for (A), (D), (E), (F), (G), (H) and (I)  
84 and one representative of two independent experiments in (B) and (C).
